# Supplementary material for: Low-loading cobalt coupled with nitrogen-doped porous graphene as excellent electrocatalyst for oxygen reduction reaction
Source: Royal Society of Chemistry journal article supplement (doi:10.1039/c4ta01043d), 2014-01-01
Supplement: c4ta01043d1.pdf [file c4ta01043d1.pdf]

## Supporting Information for

# Low-loading Cobalt Coupled with Nitrogen-Doped Porous Graphene as Excellent Electrocatalyst for Oxygen Reduction Reaction

Bo Zheng<sup>a,b</sup>, Jiong Wang<sup>a</sup>, Feng-Bin Wang<sup>a\*</sup>, and Xing-Hua Xia<sup>a\*</sup>

<sup>a</sup> State Key Laboratory of Analytical Chemistry for Life Science, School of Chemistry and Chemical Engineering, Nanjing University, Nanjing 210093, China

<sup>b</sup> School of Biochemical and Environmental Engineering, Nanjing Xiao Zhuang University, Nanjing 211171, China

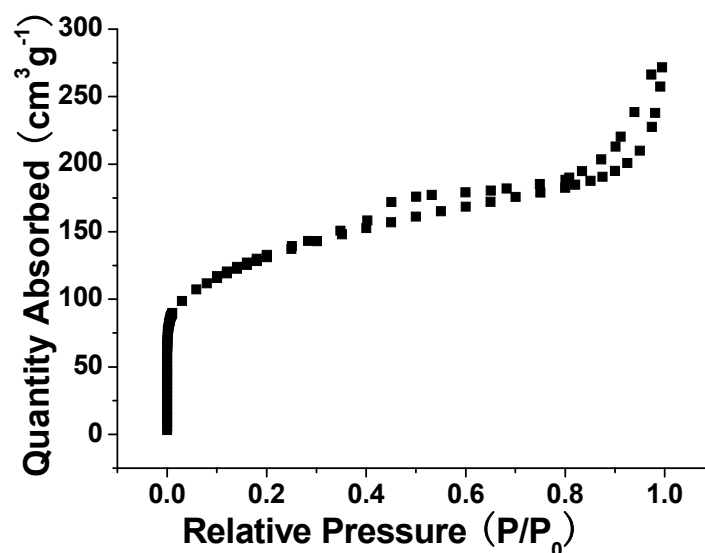

**Fig. S1** Nitrogen adsorption–desorption isotherm of N-rGO.

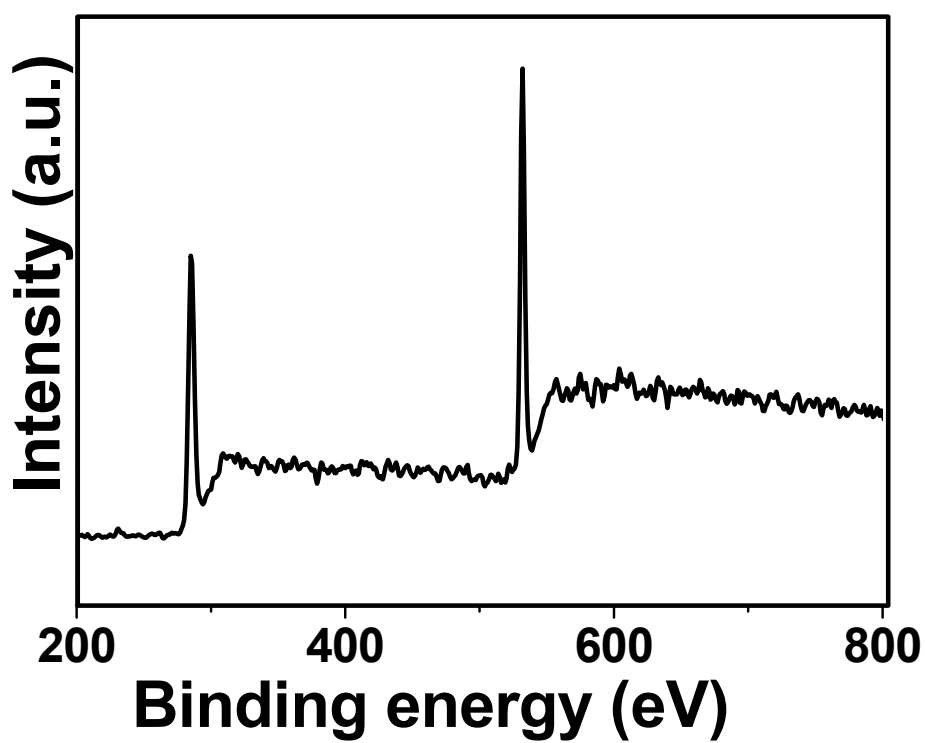

Fig. S2 XPS spectra of GO.

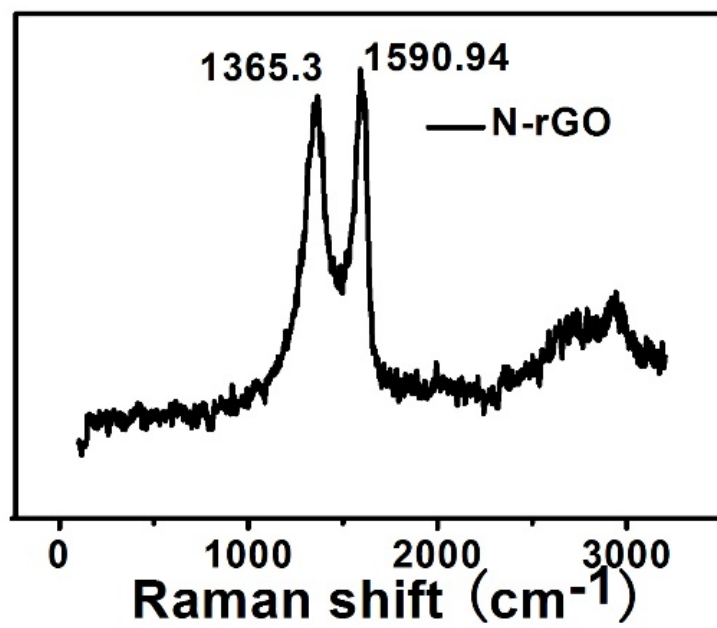

Fig. S3 Raman spectra of Co-N.

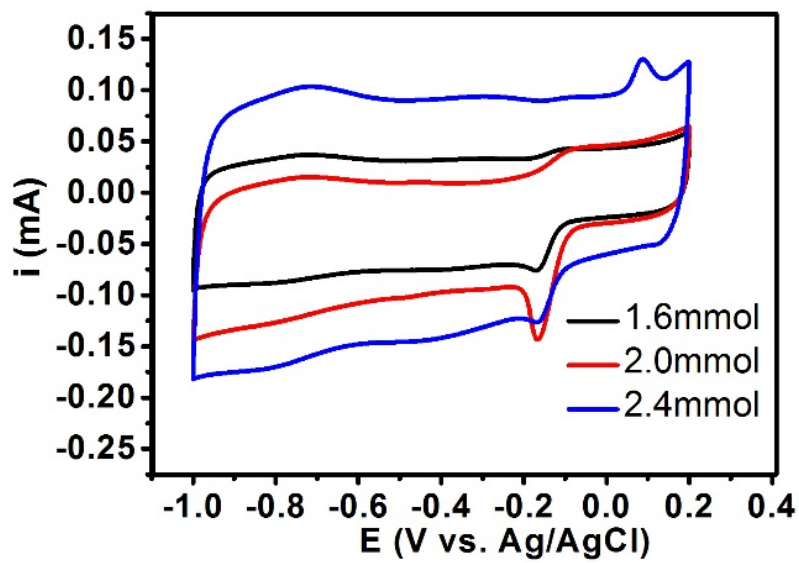

**Fig. S4** CVs of ORR on the Co-N-rGO catalysts (with different Co loading) in a  $O_2$ -saturated 0.1M KOH at a scan rate of  $50 \text{ mVs}^{-1}$ .

(a)

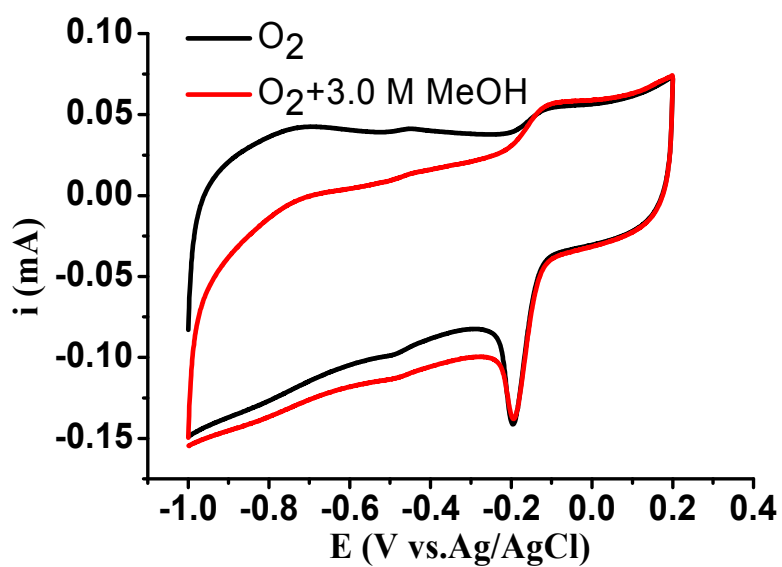

(b)

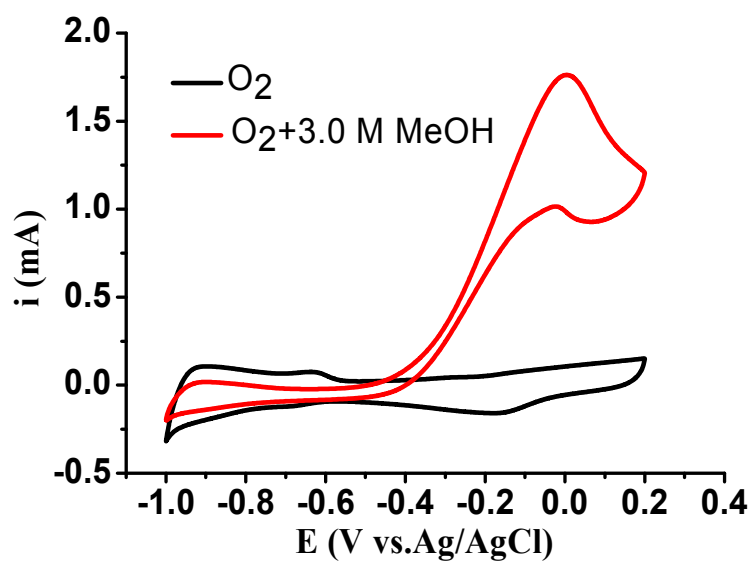

**Fig. S5** CVs of (a) Co-N-rGO and (b) Pt/C in O<sub>2</sub>-saturated 0.1 M KOH solution with and without 3.0M CH<sub>3</sub>OH. Scan rate: 100 mVs<sup>-1</sup>.

**Table S1.** Elements composition of the samples from XPS results.

| <b>sample</b> | <b>C (at%)</b> | <b>N (at%)</b> | <b>O (at%)</b> | <b>Co (at%)</b> |
|---------------|----------------|----------------|----------------|-----------------|
| GO            | 68.07          |                | 31.93          | -               |
| N-rGO         | 83.13          | 5.59           | 11.28          | -               |
| Co-N-rGO      | 85.85          | 5.66           | 8.06           | 0.44            |
| Co-N-rGO-HCl  | 85.51          | 5.59           | 8.90           | -               |
